# Supplementary material for: The gut microbiota in infants of obese mothers increases inflammation and susceptibility to NAFLD
Source: PubMed Central journal article supplement (PMC6203757; doi:10.1038/s41467-018-06929-0), 2018-10-26
Supplement: 41467_2018_6929_MOESM1_ESM.pdf [file 41467_2018_6929_MOESM1_ESM.pdf]

**Supplementary materials**

**The gut microbiota in infants of obese mothers increases inflammation and susceptibility to NAFLD**

**Soderborg et al.**

**Supplementary Table 1. Select maternal dietary macro- and micronutrients two-weeks postpartum**

|                         | Normal-weight    | Obese            | <i>P</i> value* |
|-------------------------|------------------|------------------|-----------------|
| Energy (kcal)           | 2316.99 ± 267.02 | 2580.08 ± 187.65 | 0.451           |
| Total fat (g)           | 91.29 ± 8.84     | 104.85 ± 12.05   | 0.399           |
| Total carbohydrate (g)  | 286.50 ± 42.72   | 307.91 ± 18.48   | 0.662           |
| Total protein (g)       | 93.58 ± 11.07    | 107.16 ± 9.31    | 0.384           |
| Total dietary fiber (g) | 23.24 ± 3.77     | 19.39 ± 1.87     | 0.408           |
| Choline (mg)            | 351.66 ± 50.13   | 368.49 ± 51.29   | 0.822           |

Results are expressed as mean ± SEM.

\**P* value assessed by Student's *t*-test.



**Supplementary Table 2. Forward and reverse sequences of primers used for qPCR**

| Gene Symbol    | Forward Primer            | Reverse Primer           |
|----------------|---------------------------|--------------------------|
| <i>18S</i>     | TCCGATAACGAACGAGAC        | CTAAGGGCATCACAGACC       |
| <i>Abcb11</i>  | GACTTTCCACAGTGGCGTCT      | TCACTCAACAACCCTACAGATG   |
| <i>Cpt1a</i>   | GTCCCTCCAGCTGGCTTATC      | CATGCGGCCAGTGGTGTCTA     |
| <i>Cyp7a1</i>  | TGATCCTCTGGGCATCTCAAGCAA  | AGCTCTTGGCCAGCACTCTGTAAT |
| <i>Cyp8b1</i>  | TTGCAAATGCTGCCTCAACC      | TAACAGTCGCACACATGGCT     |
| <i>Gapdh</i>   | GTGAAGGTCGGTGTGAACGGATTT  | TGGCAACAATCTCCACTTTGCCAC |
| <i>Hnf4a</i>   | GGATATGGCCGACTACAGCG      | AGATGGGGACGTGTCATTGC     |
| <i>Ifnb1</i>   | AACTCCACCAGCAGACAGTG      | GGTACCTTTGCACCCTCCAG     |
| <i>Il10</i>    | GCTCTTGCACTACCAAAGCC      | CTGCTGATCCTCATGCCAGT     |
| <i>Il1b</i>    | GCCTTGGGCCTCAAAGGAAAGAAT  | ATTGCTTGGGATCCACACTCTCCA |
| <i>Il6</i>     | TCCATCCAGTTGCCTTCTTG      | TTTCTCATTTCACGATTTCCC    |
| <i>Nr0b2</i>   | TCCTCTTCAACCCAGATGTGC     | AGACTTCACACAGTGCCCAG     |
| <i>Nr1h4</i>   | TGGCTGAATGTATGTATACAGGTTT | CAGCGTGCTGCTTCACATTT     |
| <i>Ocln</i>    | TTGAACTGTGGATTGGCAGC      | CAAGATAAGCGAACCTTGGCG    |
| <i>Ppara</i>   | TGCCCTGAACATCGAGTGTGCAAT  | TCGTACACCAGCTTCAGCCGAATA |
| <i>Pparg2</i>  | TTCGCTGATGCACTGCCTAT      | GGAATGCGAGTGGTCTTCCA     |
| <i>Slc10a1</i> | GTCCTCAAGGCAGGCATGAT      | ATCAGGGAGGAGGTAGCCAG     |
| <i>Tjp1</i>    | GATGTTTATGCGGACGGTGG      | CATTGCTGTGCTCTTAGCGG     |
| <i>Tnf</i>     | TAGCCCACGTCGTAGCAAAC      | ACAAGGTACAACCCATCGGC     |
| <i>Xbp1s</i>   | CTGAGTCCGCAGCAGGTG        | GGCAACAGTGTGAGAGTCCA     |

**A**

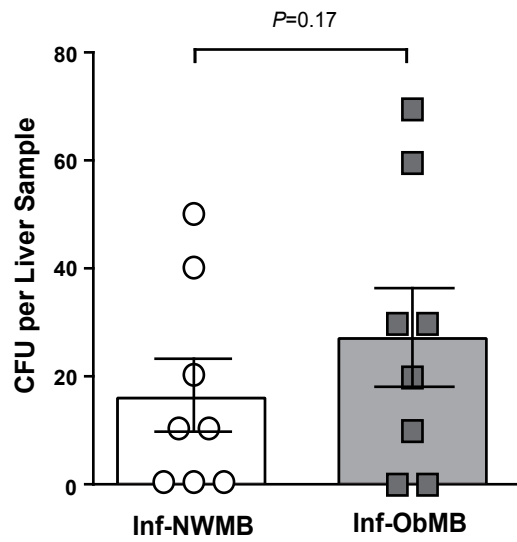

**B**

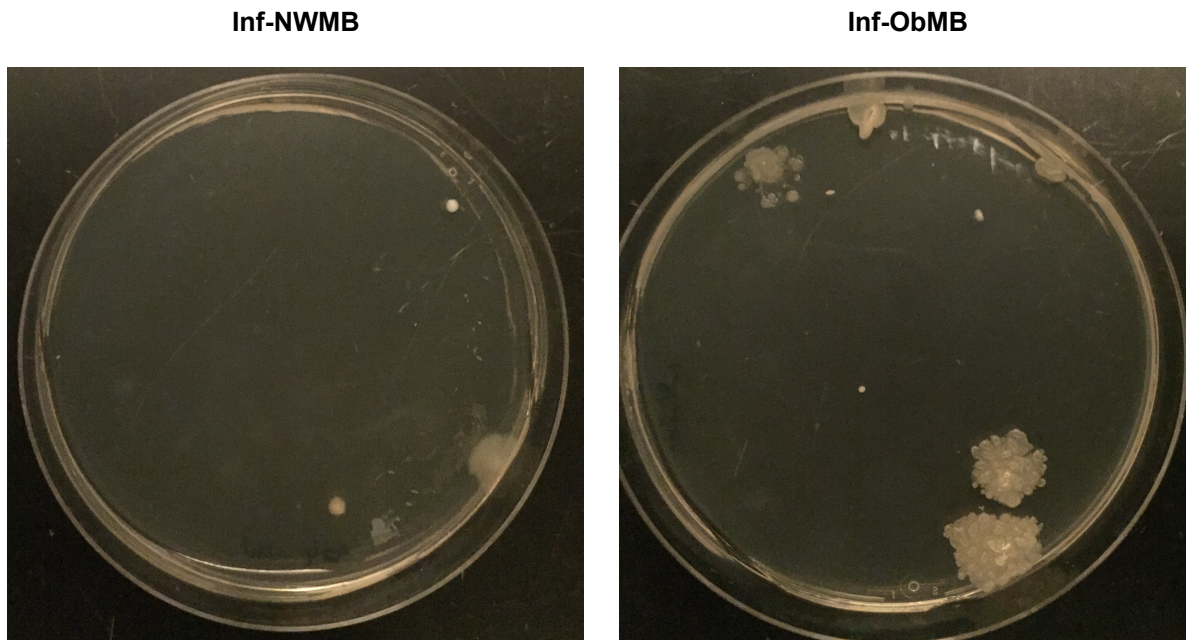

Supplementary Figure 1. Increased bacterial outgrowth from livers of Inf-ObMB mice. A) Number of colony forming units (CFU) from liver homogenate on tryptic soy broth agar plates;  $n = 8$  for both Inf-NWMB and Inf-ObMB. Data are presented as mean  $\pm$  SEM. B) Fresh livers from Inf-NWMB and Inf-ObMB mice plated on tryptic soy broth agar plates and grown overnight at 37°C.

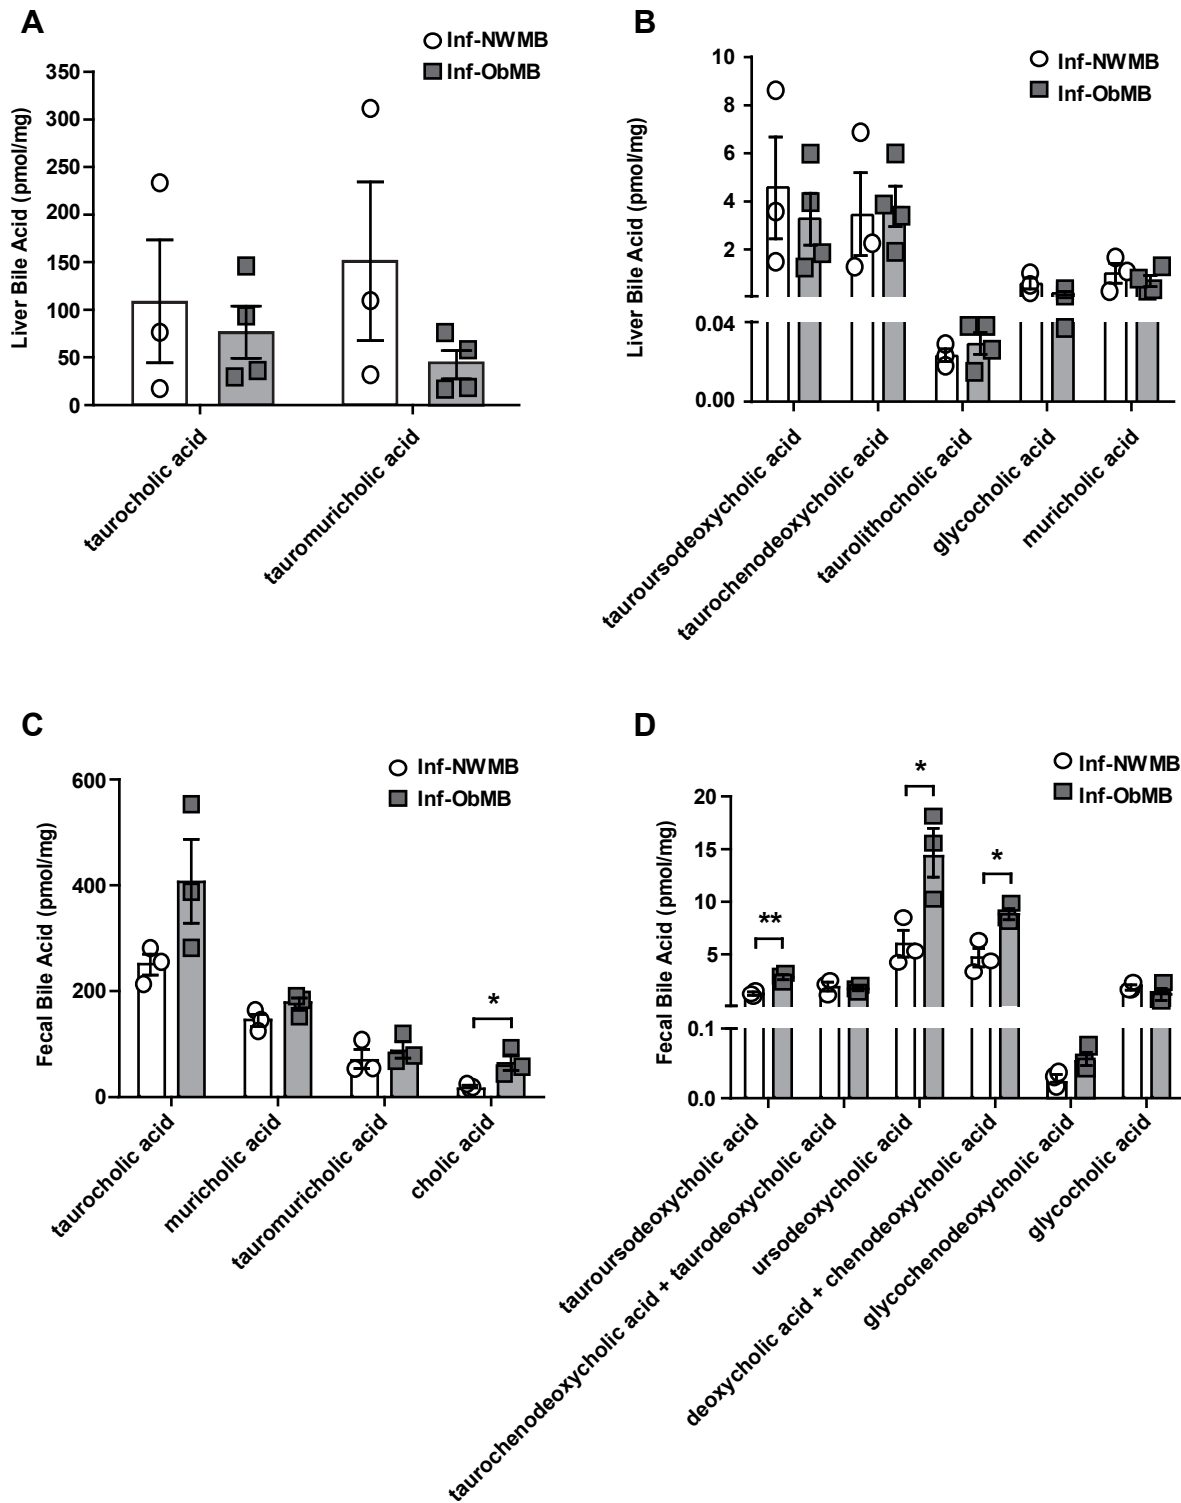

Supplementary Figure 2. Individual BA measurements in liver (A, B) and feces (C, D) in Inf-NWMB and Inf-ObMB mice.  $n = 3$  for Inf-NWMB,  $n = 4$  for Inf-ObMB for liver;  $n = 3$  per group for feces. Data are presented as mean  $\pm$  SEM. \* $P < 0.05$  and \*\* $P < 0.01$  by Student's  $t$ -test.

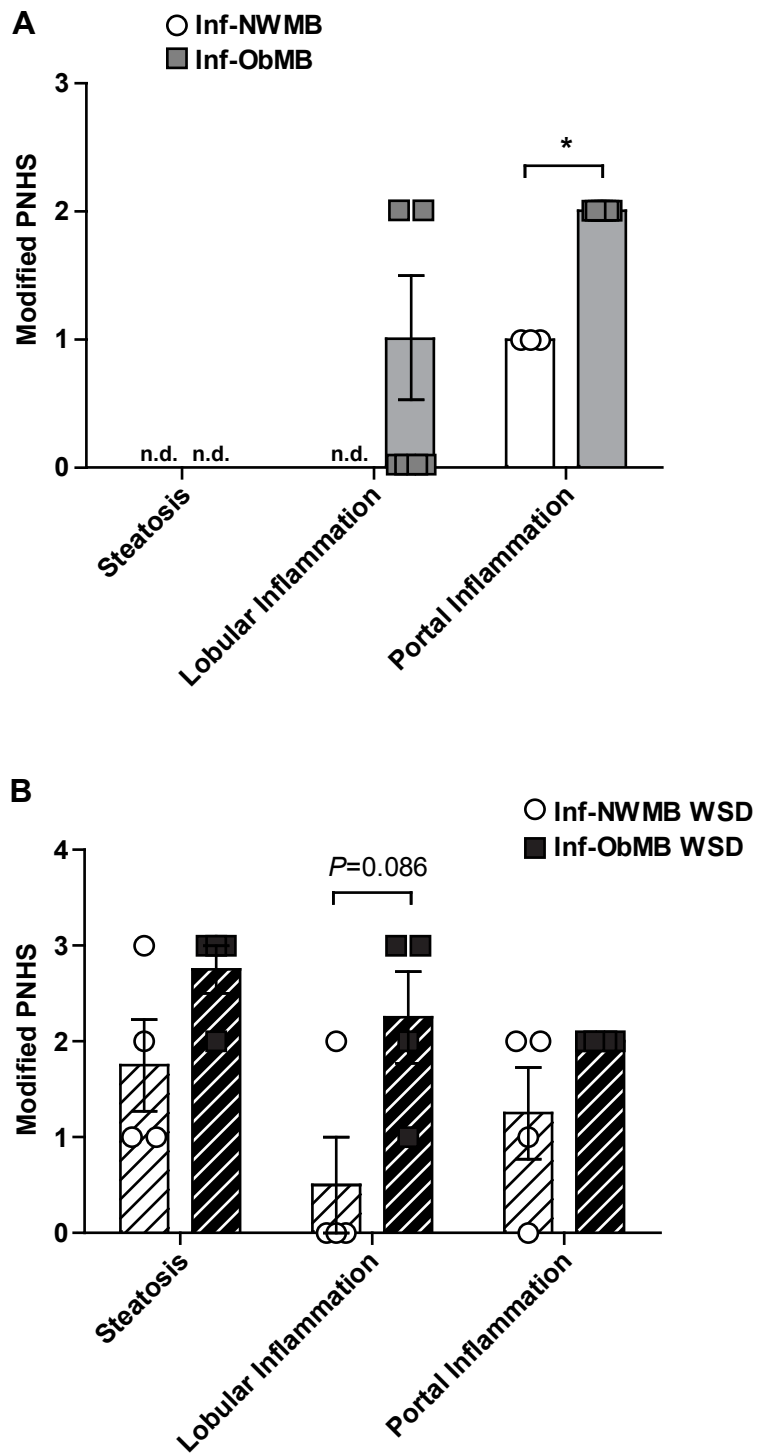

Supplementary Figure 3. Individual scores of the modified Pediatric NAFLD Histological Score (PNHS) for A) Inf-NWMB and Inf-ObMB mice and B) Inf-NWMB WSD and Inf-ObMB WSD mice. n = 3 for Inf-NWMB, n = 7 for Inf-ObMB, n = 4 for Inf-NWMB WSD and Inf-ObMB WSD. Data are presented as mean ± SEM. \*P < 0.05 by two-tailed Mann-Whitney U test.

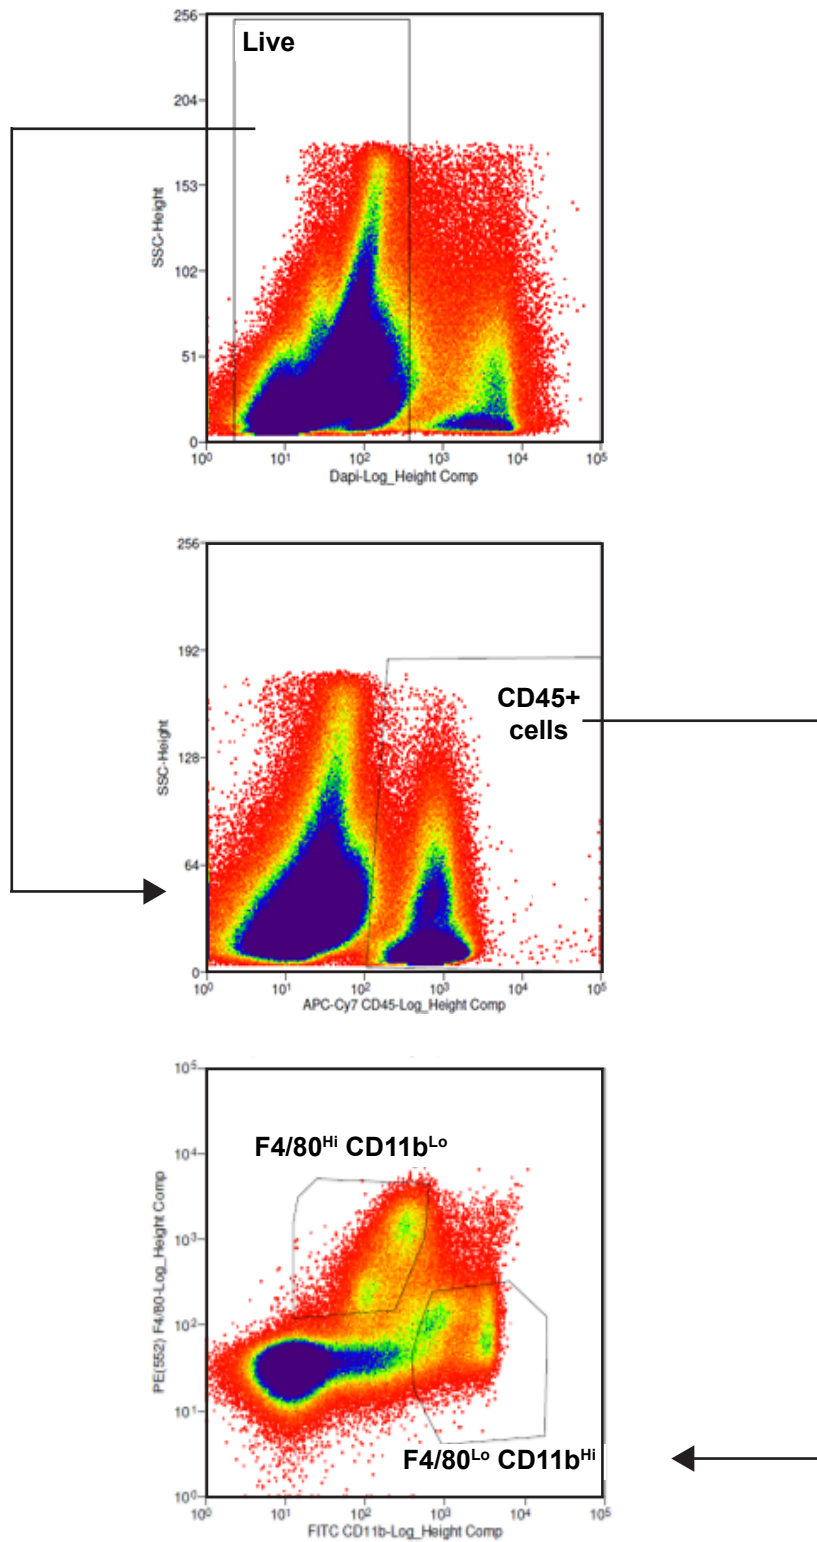

Supplementary Figure 4. Gating strategy for identifying resident and recruited liver macrophages.
